# Supplementary material for: Facet-dependent CdS/Bi4TaO8Cl Z-scheme heterojunction for enhanced photocatalytic tetracycline hydrochloride degradation and the carrier separation mechanism study via single-particle spectroscopy
Source: Royal Society of Chemistry journal article supplement (doi:10.1039/d2qi00311b), 2022-01-01
Supplement: d2qi00311b1.pdf [file d2qi00311b1.pdf]

## Facet-dependent CdS/Bi<sub>4</sub>TaO<sub>8</sub>Cl Z-scheme heterojunction for enhanced photocatalytic tetracycline hydrochloride degradation and the carrier separation mechanism study via Single-Particle Spectroscopy

Xianglin Zhu,<sup>a</sup> Honghai Miao,<sup>a</sup> Jinzhou Chen,<sup>a</sup> Xingwang Zhu,<sup>a</sup> Jianjian Yi,<sup>c</sup> Jinyuan Liu,<sup>a</sup> Zhaoke zheng,<sup>b\*</sup> Baibiao Huang,<sup>b</sup> Huaming Li,<sup>a</sup> and Hui Xu<sup>a\*</sup>

<sup>a</sup> Institute for Energy Research, Jiangsu University, Zhenjiang, Jiangsu 212013, P.R. China

<sup>b</sup> State Key Laboratory of Crystal Materials, Shandong University, Jinan, Shandong 250100, PR China

<sup>c</sup> College of Environmental Science and Engineering, Yangzhou University, Yangzhou, Jiangsu 225127, P. R. China

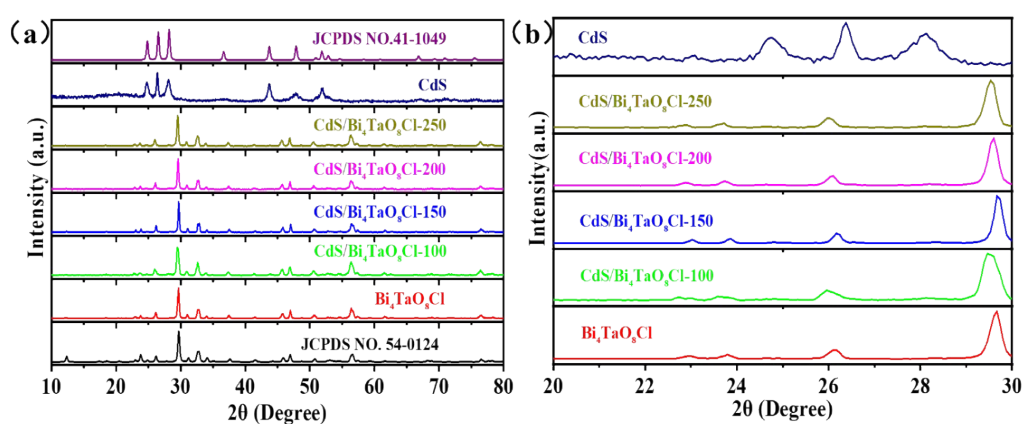

Figure S1. (a) XRD patterns of prepared catalysts, and (b) Magnification XRD patterns in the range of 20°–30°.

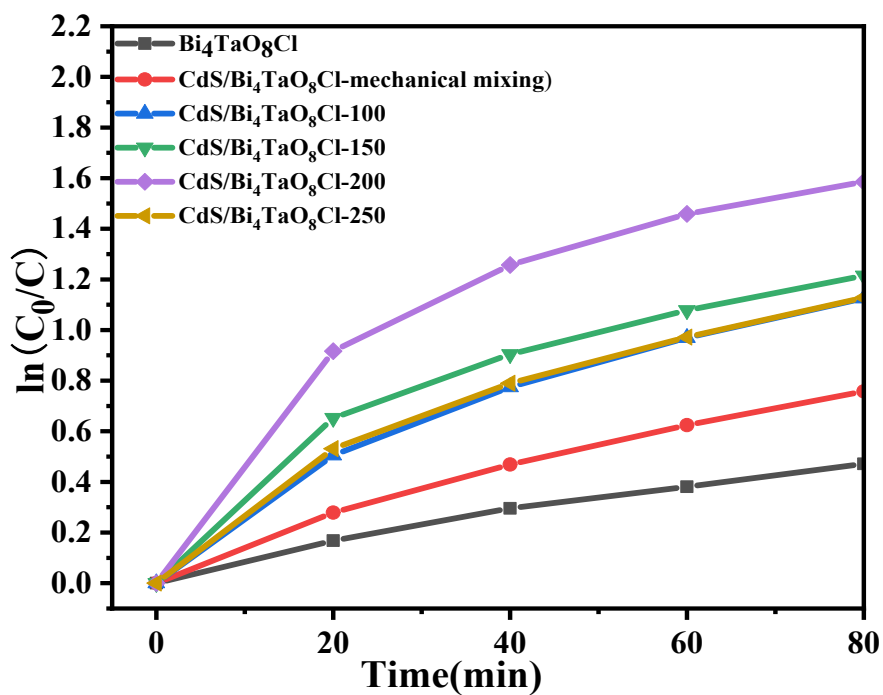

Figure S2. The Pseudo-first -order kinetics fitting curves.

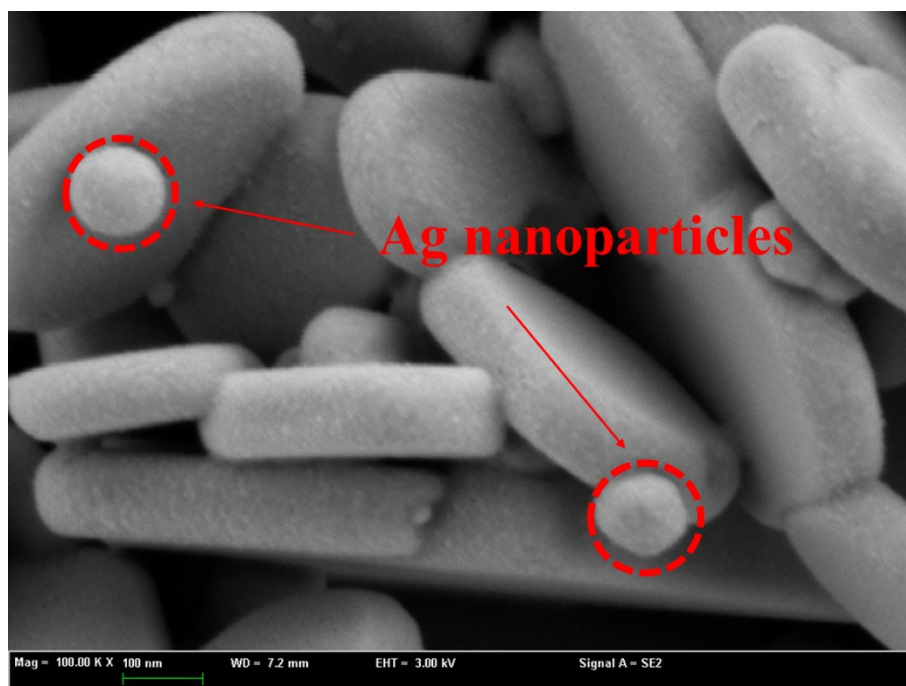

Figure S3. The SEM images of 1%  $\text{Ag/Bi}_4\text{TaO}_8\text{Cl}$  prepared with photo-deposition in the 10% methanol solution.

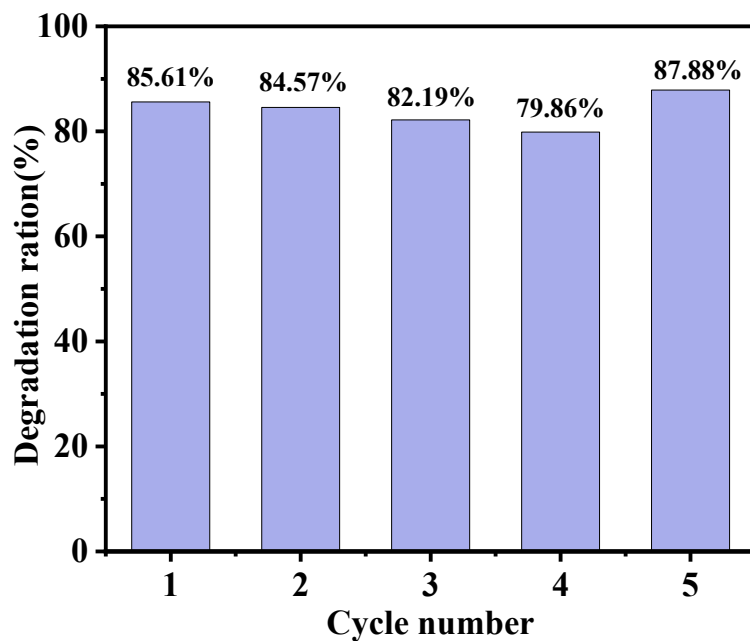

Figure S4. Cycle stability tests of CdS/Bi<sub>4</sub>TaO<sub>8</sub>Cl-200.

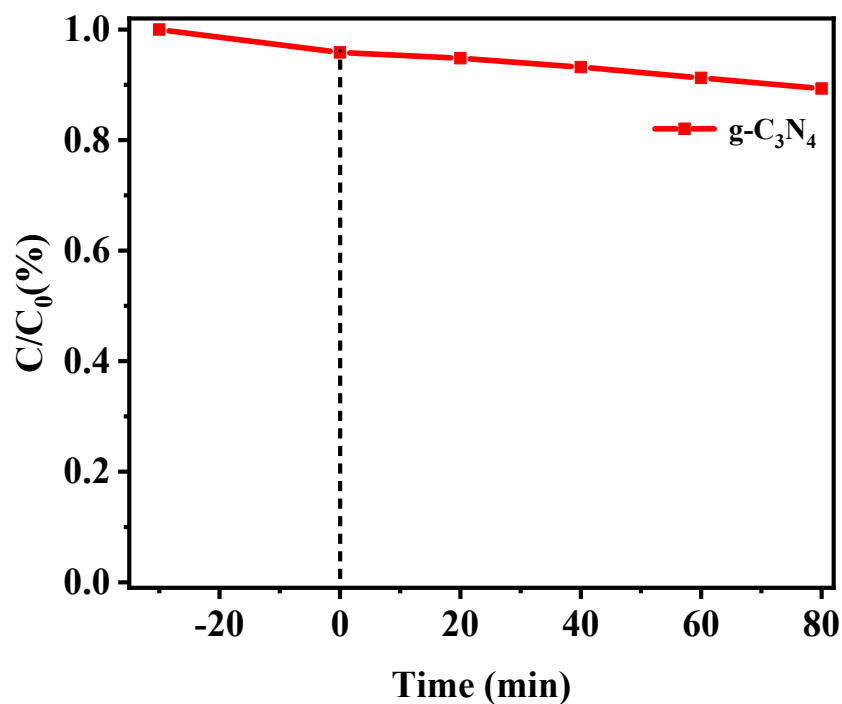

Figure S5. Photocatalytic tetracycline hydrochloride degradation with bulk g-C<sub>3</sub>N<sub>4</sub> prepared by a common method as a reference catalyst, and the degradation ration is only 10.8% in 80 mins. This result can eliminate factors caused by the experimental conditions combined with the efficient degradation of CdS, Bi<sub>4</sub>TaO<sub>8</sub>Cl, and CdS/Bi<sub>4</sub>TaO<sub>8</sub>Cl-200.

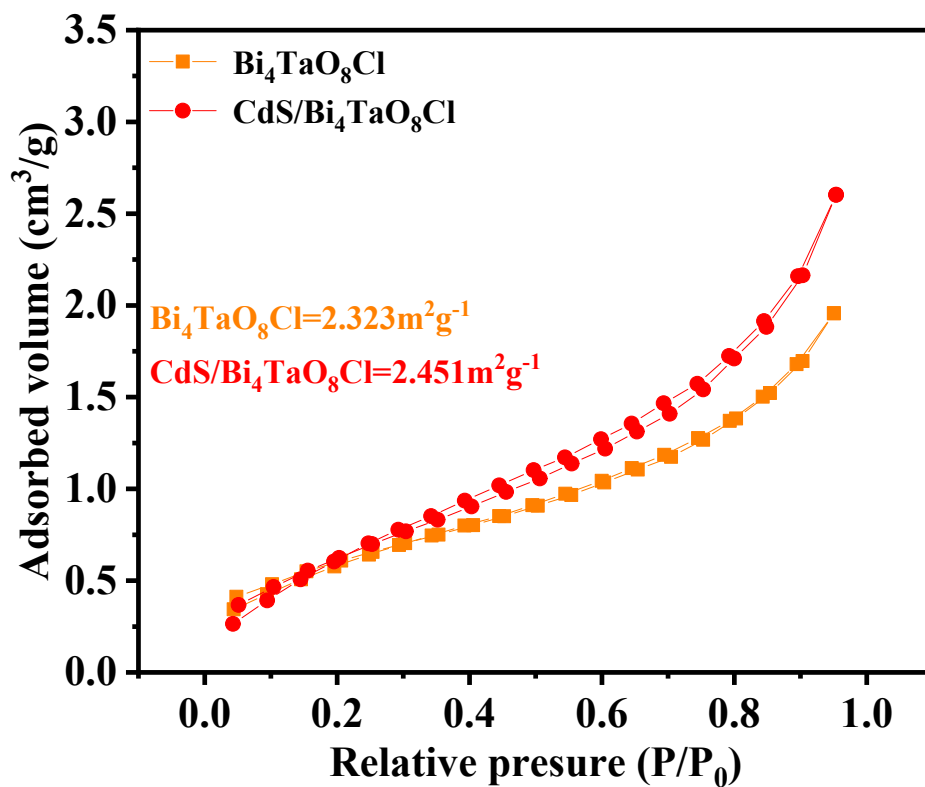

Figure S6. BET surface area results of Bi<sub>4</sub>TaO<sub>8</sub>Cl and Bi<sub>4</sub>TaO<sub>8</sub>Cl-200. Both Bi<sub>4</sub>TaO<sub>8</sub>Cl and CdS/Bi<sub>4</sub>TaO<sub>8</sub>Cl-200 have the small BET surface area. After the modification of CdS, the BET surface area of CdS/Bi<sub>4</sub>TaO<sub>8</sub>Cl-200 changes very little and this eliminate factors caused by BET surface area difference.

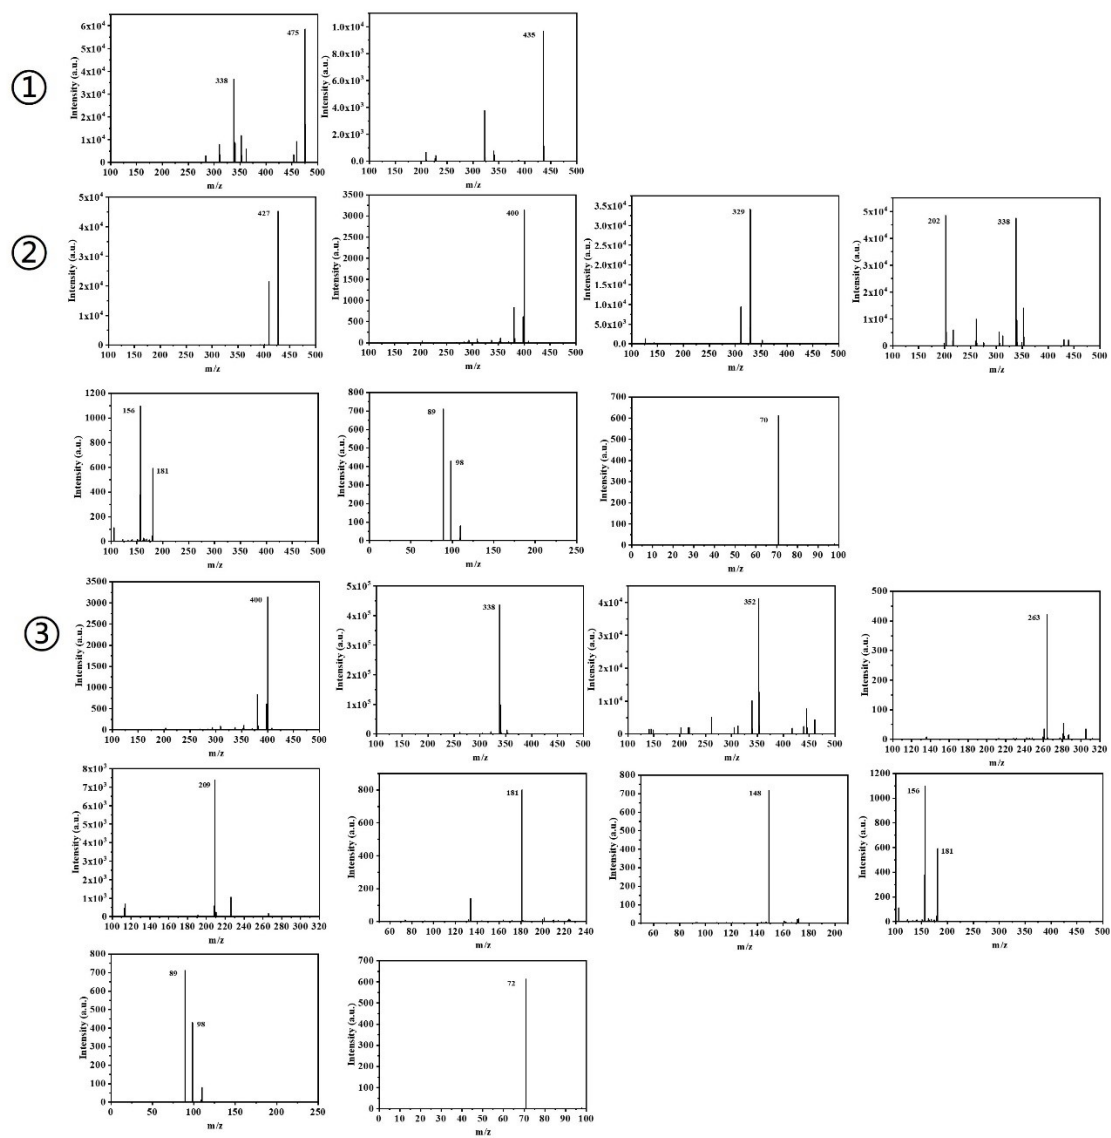

Figure S7. The observed m/z values of the generated intermediate products.

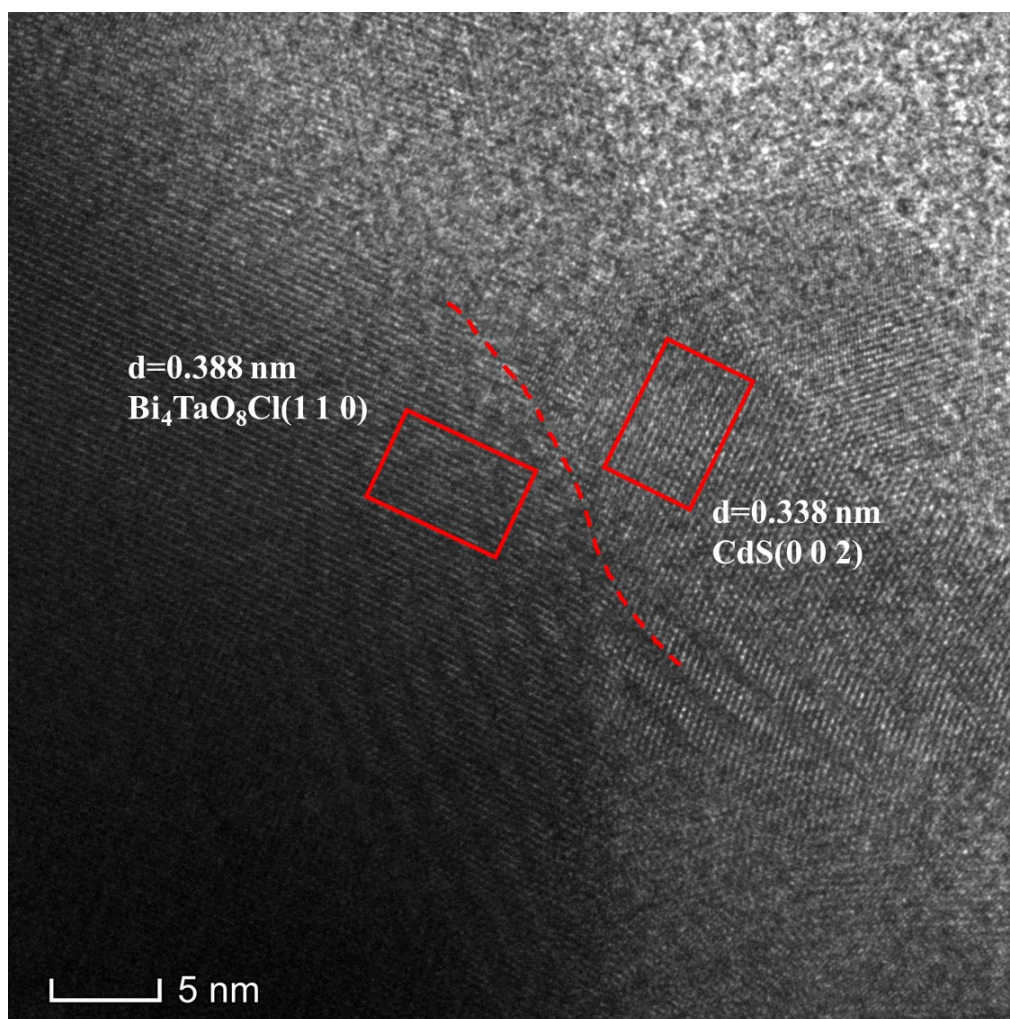

Figure S8. HRTEM image of CdS/Bi<sub>4</sub>TaO<sub>8</sub>Cl-200

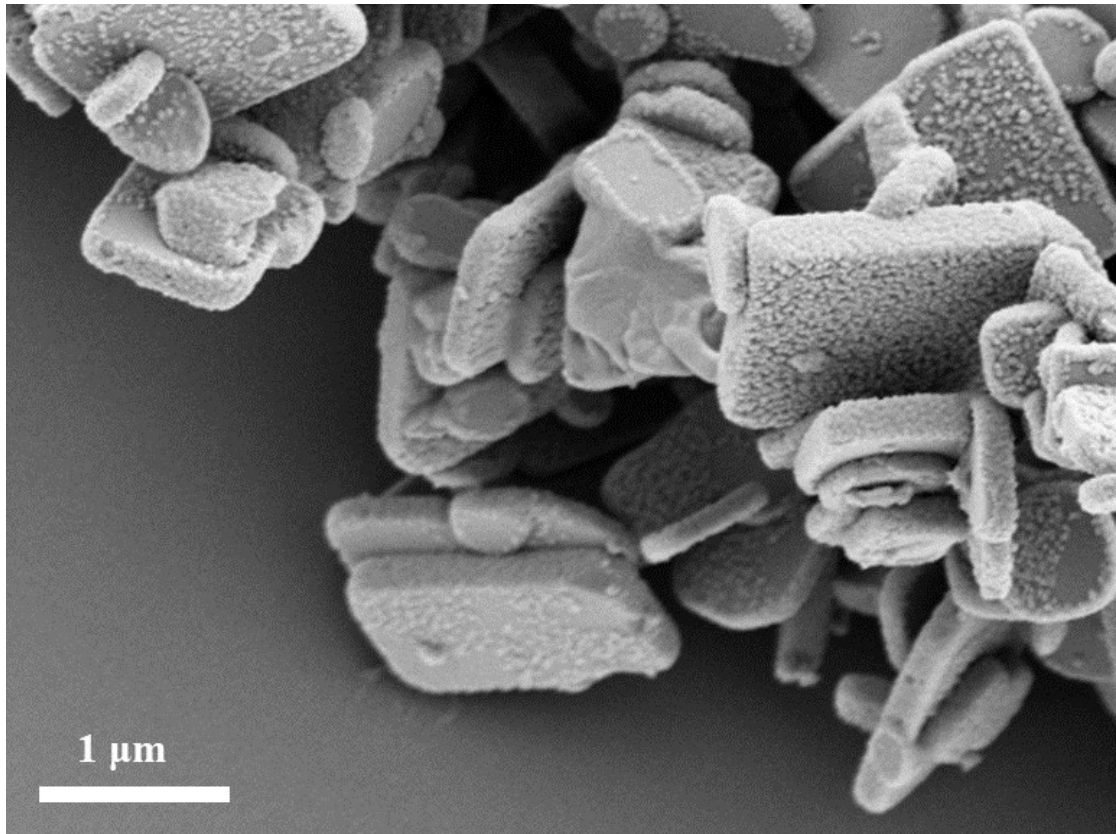

Figure S9. SEM image of CdS/Bi<sub>4</sub>TaO<sub>8</sub>Cl-mechanical

The SEM image of CdS/Bi<sub>4</sub>TaO<sub>8</sub>Cl-mechanical was provided in Figure S9. From the deposition of CdS particles on the Bi<sub>4</sub>TaO<sub>8</sub>Cl were not facet-dependent, that can prove the importance of facet-dependent heterojunction.
